# Supplementary material for: Potential Current and Future Distribution of the Long-Whiskered Owlet (Xenoglaux loweryi) in Amazonas and San Martin, NW Peru
Source: MDPI journal article supplement (doi:10.3390/ani12141794), 2022-07-13
Supplement: s1 [file s1]

**Table S1.** Variables for the MaxEnt model of *X. loweryi* in Amazonas and San Martin areas (Peru).

| Category                | code      | Description                                                                                  | Unit         |
|-------------------------|-----------|----------------------------------------------------------------------------------------------|--------------|
| Bioclimatic             | Bio01     | Annual Mean Temperature                                                                      | °C           |
|                         | Bio02     | Mean Diurnal Range (mean of monthly ( $T^{\circ}_{\text{máx.}} - T^{\circ}_{\text{min.}}$ )) | °C           |
|                         | Bio03     | Isothermality (Bio02/Bio07) (* 100)                                                          |              |
|                         | Bio04     | Temperature Seasonality (standard deviation *100)                                            | °C           |
|                         | Bio05     | Max Temperature of Warmest Month                                                             | °C           |
|                         | Bio06     | Min Temperature of Coldest Month                                                             | °C           |
|                         | Bio07     | Temperature Annual Range (Bio05-Bio06)                                                       | °C           |
|                         | Bio08     | Mean Temperature of Wettest Quarter                                                          | °C           |
|                         | Bio09     | Mean Temperature of Driest Quarter                                                           | °C           |
|                         | Bio10     | Mean Temperature of Warmest Quarter                                                          | °C           |
|                         | Bio11     | Mean Temperature of Coldest Quarter                                                          | °C           |
|                         | Bio12     | Annual Precipitation                                                                         | mm           |
|                         | Bio13     | Precipitation of Wettest Month                                                               | mm           |
|                         | Bio14     | Precipitation of Driest Month                                                                | mm           |
|                         | Bio15     | Precipitation Seasonality (coefficient of variation)                                         | mm           |
|                         | Bio16     | Precipitation of Wettest Quarter                                                             | mm           |
|                         | Bio17     | Precipitation of Driest Quarter                                                              | mm           |
|                         | Bio18     | Precipitation of Warmest Quarter                                                             | mm           |
|                         | Bio19     | Precipitation of Coldest Quarter                                                             | mm           |
| Topographic             | alt       | altitude                                                                                     | msnm         |
|                         | slo       | slope                                                                                        | %            |
|                         | asp       | aspect                                                                                       | °            |
| shelter availability    | tree      | tree cover                                                                                   | %            |
|                         | shrub     | shrub cover                                                                                  | %            |
|                         | grass     | grass cover                                                                                  | %            |
|                         | crop      | crop cover                                                                                   | %            |
|                         | bare      | bare cover                                                                                   | %            |
|                         | ecosystem | ecosystems                                                                                   | -            |
|                         | th        | tree height                                                                                  | m            |
| environmental variables | rh        | relative humidity                                                                            | %            |
|                         | srad      | solar radiation                                                                              | MJ m-2 day-1 |
|                         | wa        | proximity to water                                                                           | m            |

**Table S2.** Pearson correlation coefficients (r) between environmental variables for modelling the potential distribution of *X. loweryi* in Amazonas and San Martin areas (Peru).

|            | bio_1 | bio_2 | bio_3 | bio_4 | bio_5 | bio_6 | bio_7 | bio_8 | bio_9 | bio_10 | bio_11 | bio_12 | bio_13 | bio_14 | bio_15 | bio_16 | bio_17 | bio_18 | bio_19 | bare  | crops | shrub | grass | tree  | h_tree | dem   | slope | aspect | h.relative | radiation | d_water |
|------------|-------|-------|-------|-------|-------|-------|-------|-------|-------|--------|--------|--------|--------|--------|--------|--------|--------|--------|--------|-------|-------|-------|-------|-------|--------|-------|-------|--------|------------|-----------|---------|
| bio_1      | 1     | 0.74  | 0.96  | -0.67 | 0.99  | 0.99  | 0.30  | 0.99  | 0.99  | 0.99   | 0.99   | -0.14  | -0.48  | -0.30  | -0.34  | -0.26  | -0.27  | 0.15   | -0.22  | 0.03  | 0.06  | -0.13 | -0.01 | 0.06  | 0.29   | -0.99 | -0.03 | -0.17  | 0.22       | 0.39      | -0.29   |
| bio_2      | 0.74  | 1     | 0.69  | -0.22 | 0.78  | 0.69  | 0.85  | 0.73  | 0.73  | 0.74   | 0.73   | -0.53  | -0.56  | -0.67  | 0.21   | -0.59  | -0.69  | -0.14  | -0.65  | 0.27  | 0.32  | 0.00  | 0.29  | -0.20 | -0.12  | -0.72 | 0.07  | -0.02  | -0.08      | 0.68      | -0.46   |
| bio_3      | 0.96  | 0.69  | 1     | -0.77 | 0.95  | 0.96  | 0.21  | 0.96  | 0.96  | 0.96   | 0.96   | -0.18  | -0.46  | -0.37  | -0.27  | -0.27  | -0.33  | 0.12   | -0.29  | 0.03  | 0.06  | -0.15 | -0.06 | 0.09  | 0.35   | -0.95 | -0.07 | -0.26  | 0.36       | 0.40      | -0.28   |
| bio_4      | -0.67 | -0.22 | -0.77 | 1     | -0.63 | -0.70 | 0.27  | -0.67 | -0.67 | -0.66  | -0.68  | -0.06  | 0.26   | 0.02   | 0.48   | 0.03   | -0.02  | -0.14  | -0.03  | 0.06  | 0.05  | 0.35  | 0.40  | -0.38 | -0.54  | 0.69  | 0.33  | 0.23   | -0.55      | 0.01      | 0.05    |
| bio_5      | 0.99  | 0.78  | 0.95  | -0.63 | 1     | 0.99  | 0.36  | 0.99  | 0.99  | 0.99   | 0.997  | -0.18  | -0.51  | -0.34  | -0.31  | -0.30  | -0.31  | 0.12   | -0.26  | 0.05  | 0.09  | -0.12 | 0.02  | 0.03  | 0.25   | -0.98 | -0.02 | -0.15  | 0.18       | 0.42      | -0.31   |
| bio_6      | 0.99  | 0.69  | 0.96  | -0.70 | 0.99  | 1     | 0.23  | 0.99  | 0.99  | 0.99   | 0.99   | -0.10  | -0.47  | -0.26  | -0.39  | -0.23  | -0.22  | 0.16   | -0.17  | 0.00  | 0.03  | -0.14 | -0.05 | 0.08  | 0.33   | -0.98 | -0.05 | -0.18  | 0.24       | 0.34      | -0.26   |
| bio_7      | 0.30  | 0.85  | 0.21  | 0.27  | 0.36  | 0.23  | 1     | 0.29  | 0.29  | 0.30   | 0.29   | -0.59  | -0.43  | -0.64  | 0.48   | -0.60  | -0.70  | -0.28  | -0.68  | 0.34  | 0.39  | 0.10  | 0.43  | -0.33 | -0.42  | -0.29 | 0.14  | 0.16   | -0.36      | 0.64      | -0.41   |
| bio_8      | 0.99  | 0.73  | 0.96  | -0.67 | 0.99  | 0.99  | 0.29  | 1     | 0.99  | 0.99   | 0.99   | -0.14  | -0.49  | -0.30  | -0.35  | -0.26  | -0.27  | 0.14   | -0.22  | 0.03  | 0.06  | -0.13 | -0.02 | 0.06  | 0.29   | -0.99 | -0.03 | -0.17  | 0.22       | 0.38      | -0.29   |
| bio_9      | 0.99  | 0.73  | 0.96  | -0.67 | 0.99  | 0.99  | 0.29  | 0.99  | 1     | 0.99   | 0.99   | -0.13  | -0.48  | -0.29  | -0.35  | -0.25  | -0.26  | 0.15   | -0.21  | 0.03  | 0.06  | -0.14 | -0.02 | 0.06  | 0.30   | -0.99 | -0.03 | -0.17  | 0.22       | 0.38      | -0.29   |
| bio_10     | 0.99  | 0.74  | 0.96  | -0.66 | 0.99  | 0.99  | 0.30  | 0.99  | 0.99  | 1      | 0.99   | -0.14  | -0.48  | -0.30  | -0.34  | -0.26  | -0.27  | 0.15   | -0.22  | 0.03  | 0.06  | -0.13 | -0.01 | 0.05  | 0.29   | -0.99 | -0.03 | -0.17  | 0.22       | 0.39      | -0.29   |
| bio_11     | 0.99  | 0.73  | 0.96  | -0.68 | 0.99  | 0.99  | 0.29  | 0.99  | 0.99  | 0.99   | 1      | -0.13  | -0.48  | -0.30  | -0.35  | -0.26  | -0.27  | 0.15   | -0.21  | 0.03  | 0.06  | -0.14 | -0.02 | 0.06  | 0.30   | -0.99 | -0.04 | -0.17  | 0.23       | 0.38      | -0.29   |
| bio_12     | -0.14 | -0.53 | -0.18 | -0.06 | -0.18 | -0.10 | -0.59 | -0.14 | -0.13 | -0.14  | -0.13  | 1.00   | 0.81   | 0.84   | -0.63  | 0.96   | 0.84   | 0.85   | 0.84   | -0.20 | -0.25 | 0.00  | -0.26 | 0.17  | 0.18   | 0.12  | 0.17  | -0.08  | 0.23       | -0.45     | 0.05    |
| bio_13     | -0.48 | -0.56 | -0.46 | 0.26  | -0.51 | -0.47 | -0.43 | -0.49 | -0.48 | -0.48  | -0.48  | 0.81   | 1      | 0.57   | -0.07  | 0.90   | 0.54   | 0.76   | 0.51   | -0.08 | -0.13 | 0.10  | -0.09 | 0.01  | -0.06  | 0.48  | 0.25  | -0.04  | 0.25       | -0.25     | -0.01   |
| bio_14     | -0.30 | -0.67 | -0.37 | 0.02  | -0.34 | -0.26 | -0.64 | -0.30 | -0.29 | -0.30  | -0.30  | 0.84   | 0.57   | 1      | -0.72  | 0.76   | 0.98   | 0.44   | 0.98   | -0.26 | -0.31 | -0.08 | -0.35 | 0.26  | 0.14   | 0.27  | 0.02  | 0.05   | 0.14       | -0.56     | 0.30    |
| bio_15     | -0.34 | 0.21  | -0.27 | 0.48  | -0.31 | -0.39 | 0.48  | -0.35 | -0.35 | -0.34  | -0.35  | -0.63  | -0.07  | -0.72  | 1      | -0.43  | -0.76  | -0.40  | -0.79  | 0.22  | 0.24  | 0.16  | 0.36  | -0.30 | -0.39  | 0.37  | 0.08  | 0.09   | -0.16      | 0.46      | -0.12   |
| bio_16     | -0.26 | -0.59 | -0.27 | 0.03  | -0.30 | -0.23 | -0.60 | -0.26 | -0.25 | -0.26  | -0.26  | 0.96   | 0.90   | 0.76   | -0.43  | 1      | 0.75   | 0.84   | 0.75   | -0.22 | -0.26 | -0.02 | -0.24 | 0.17  | 0.15   | 0.25  | 0.21  | -0.07  | 0.26       | -0.41     | 0.06    |
| bio_17     | -0.27 | -0.69 | -0.33 | -0.02 | -0.31 | -0.22 | -0.70 | -0.27 | -0.26 | -0.27  | -0.27  | 0.84   | 0.54   | 0.98   | -0.76  | 0.75   | 1      | 0.45   | 0.99   | -0.25 | -0.30 | -0.03 | -0.34 | 0.24  | 0.17   | 0.24  | 0.03  | 0.00   | 0.13       | -0.62     | 0.33    |
| bio_18     | 0.15  | -0.14 | 0.12  | -0.14 | 0.12  | 0.16  | -0.28 | 0.14  | 0.15  | 0.15   | 0.15   | 0.85   | 0.76   | 0.44   | -0.40  | 0.84   | 0.45   | 1      | 0.46   | -0.09 | -0.12 | 0.04  | -0.10 | 0.04  | 0.16   | -0.14 | 0.28  | -0.14  | 0.25       | -0.14     | -0.26   |
| bio_19     | -0.22 | -0.65 | -0.29 | -0.03 | -0.26 | -0.17 | -0.68 | -0.22 | -0.21 | -0.22  | -0.21  | 0.84   | 0.51   | 0.98   | -0.79  | 0.75   | 0.99   | 0.46   | 1      | -0.26 | -0.30 | -0.03 | -0.34 | 0.24  | 0.18   | 0.19  | 0.06  | -0.01  | 0.11       | -0.61     | 0.30    |
| bare       | 0.03  | 0.27  | 0.03  | 0.06  | 0.05  | 0.00  | 0.34  | 0.03  | 0.03  | 0.03   | 0.03   | -0.20  | -0.08  | -0.26  | 0.22   | -0.22  | -0.25  | -0.09  | -0.26  | 1     | 0.99  | 0.46  | 0.43  | -0.58 | -0.32  | -0.03 | 0.10  | 0.09   | -0.05      | 0.17      | -0.16   |
| crops      | 0.06  | 0.32  | 0.06  | 0.05  | 0.09  | 0.03  | 0.39  | 0.06  | 0.06  | 0.06   | 0.06   | -0.25  | -0.13  | -0.31  | 0.24   | -0.26  | -0.30  | -0.12  | -0.30  | 0.99  | 1     | 0.36  | 0.45  | -0.55 | -0.32  | -0.07 | 0.07  | 0.12   | -0.06      | 0.19      | -0.15   |
| shrub      | -0.13 | 0.00  | -0.15 | 0.35  | -0.12 | -0.14 | 0.10  | -0.13 | -0.14 | -0.13  | -0.14  | 0.00   | 0.10   | -0.08  | 0.16   | -0.02  | -0.03  | 0.04   | -0.03  | 0.46  | 0.36  | 1     | 0.69  | -0.90 | -0.47  | 0.19  | 0.55  | -0.04  | -0.19      | 0.04      | -0.20   |
| grass      | -0.01 | 0.29  | -0.06 | 0.40  | 0.02  | -0.05 | 0.43  | -0.02 | -0.02 | -0.01  | -0.02  | -0.26  | -0.09  | -0.35  | 0.36   | -0.24  | -0.34  | -0.10  | -0.34  | 0.43  | 0.45  | 0.69  | 1     | -0.93 | -0.59  | 0.05  | 0.39  | 0.16   | -0.28      | 0.16      | -0.25   |
| tree       | 0.06  | -0.20 | 0.09  | -0.38 | 0.03  | 0.08  | -0.33 | 0.06  | 0.06  | 0.05   | 0.06   | 0.17   | 0.01   | 0.26   | -0.30  | 0.17   | 0.24   | 0.04   | 0.24   | -0.58 | -0.55 | -0.90 | -0.93 | 1     | 0.59   | -0.10 | -0.48 | -0.08  | 0.23       | -0.14     | 0.25    |
| h_tree     | 0.29  | -0.12 | 0.35  | -0.54 | 0.25  | 0.33  | -0.42 | 0.29  | 0.30  | 0.29   | 0.30   | 0.18   | -0.06  | 0.14   | -0.39  | 0.15   | 0.17   | 0.16   | 0.18   | -0.32 | -0.32 | -0.47 | -0.59 | 0.59  | 1      | -0.29 | -0.37 | 0.07   | 0.35       | -0.10     | 0.16    |
| dem        | -0.99 | -0.72 | -0.95 | 0.69  | -0.98 | -0.98 | -0.29 | -0.99 | -0.99 | -0.99  | -0.99  | 0.12   | 0.48   | 0.27   | 0.37   | 0.25   | 0.24   | -0.14  | 0.19   | -0.03 | -0.07 | 0.19  | 0.05  | -0.10 | -0.29  | 1     | 0.07  | 0.14   | -0.23      | -0.36     | 0.26    |
| slope      | -0.03 | 0.07  | -0.07 | 0.33  | -0.02 | -0.05 | 0.14  | -0.03 | -0.03 | -0.03  | -0.04  | 0.17   | 0.25   | 0.02   | 0.08   | 0.21   | 0.03   | 0.28   | 0.06   | 0.10  | 0.07  | 0.55  | 0.39  | -0.48 | -0.37  | 0.07  | 1     | -0.19  | -0.22      | 0.05      | -0.39   |
| aspect     | -0.17 | -0.02 | -0.26 | 0.23  | -0.15 | -0.18 | 0.16  | -0.17 | -0.17 | -0.17  | -0.17  | -0.08  | -0.04  | 0.05   | 0.09   | -0.07  | 0.00   | -0.14  | -0.01  | 0.09  | 0.12  | -0.04 | 0.16  | -0.08 | 0.07   | 0.14  | -0.19 | 1      | -0.20      | -0.01     | 0.16    |
| h_relative | 0.22  | -0.08 | 0.36  | -0.55 | 0.18  | 0.24  | -0.36 | 0.22  | 0.22  | 0.22   | 0.23   | 0.23   | 0.25   | 0.14   | -0.16  | 0.26   | 0.13   | 0.25   | 0.11   | -0.05 | -0.06 | -0.19 | -0.28 | 0.23  | 0.35   | -0.23 | -0.22 | -0.20  | 1          | 0.26      | 0.10    |
| radiation  | 0.39  | 0.68  | 0.40  | 0.01  | 0.42  | 0.34  | 0.64  | 0.38  | 0.38  | 0.39   | 0.38   | -0.45  | -0.25  | -0.56  | 0.46   | -0.41  | -0.62  | -0.14  | -0.61  | 0.17  | 0.19  | 0.04  | 0.16  | -0.14 | -0.10  | -0.36 | 0.05  | -0.01  | 0.26       | 1         | -0.24   |
| d_water    | -0.29 | -0.46 | -0.28 | 0.05  | -0.31 | -0.26 | -0.41 | -0.29 | -0.29 | -0.29  | -0.29  | 0.05   | -0.01  | 0.30   | -0.12  | 0.06   | 0.33   | -0.26  | 0.30   | -0.16 | -0.15 | -0.20 | -0.25 | 0.25  | 0.16   | 0.26  | -0.39 | 0.16   | 0.10       | -0.24     | 1       |

**Figure S1.** Jackknife test in a preliminary model generated using only the 32 environmental variables for the modelling of the potential distribution of *X. loweryi* in Amazonas and San Martín areas (Peru). Regularized training gain without variable (green), with only variable (blue) and with all variables (red).

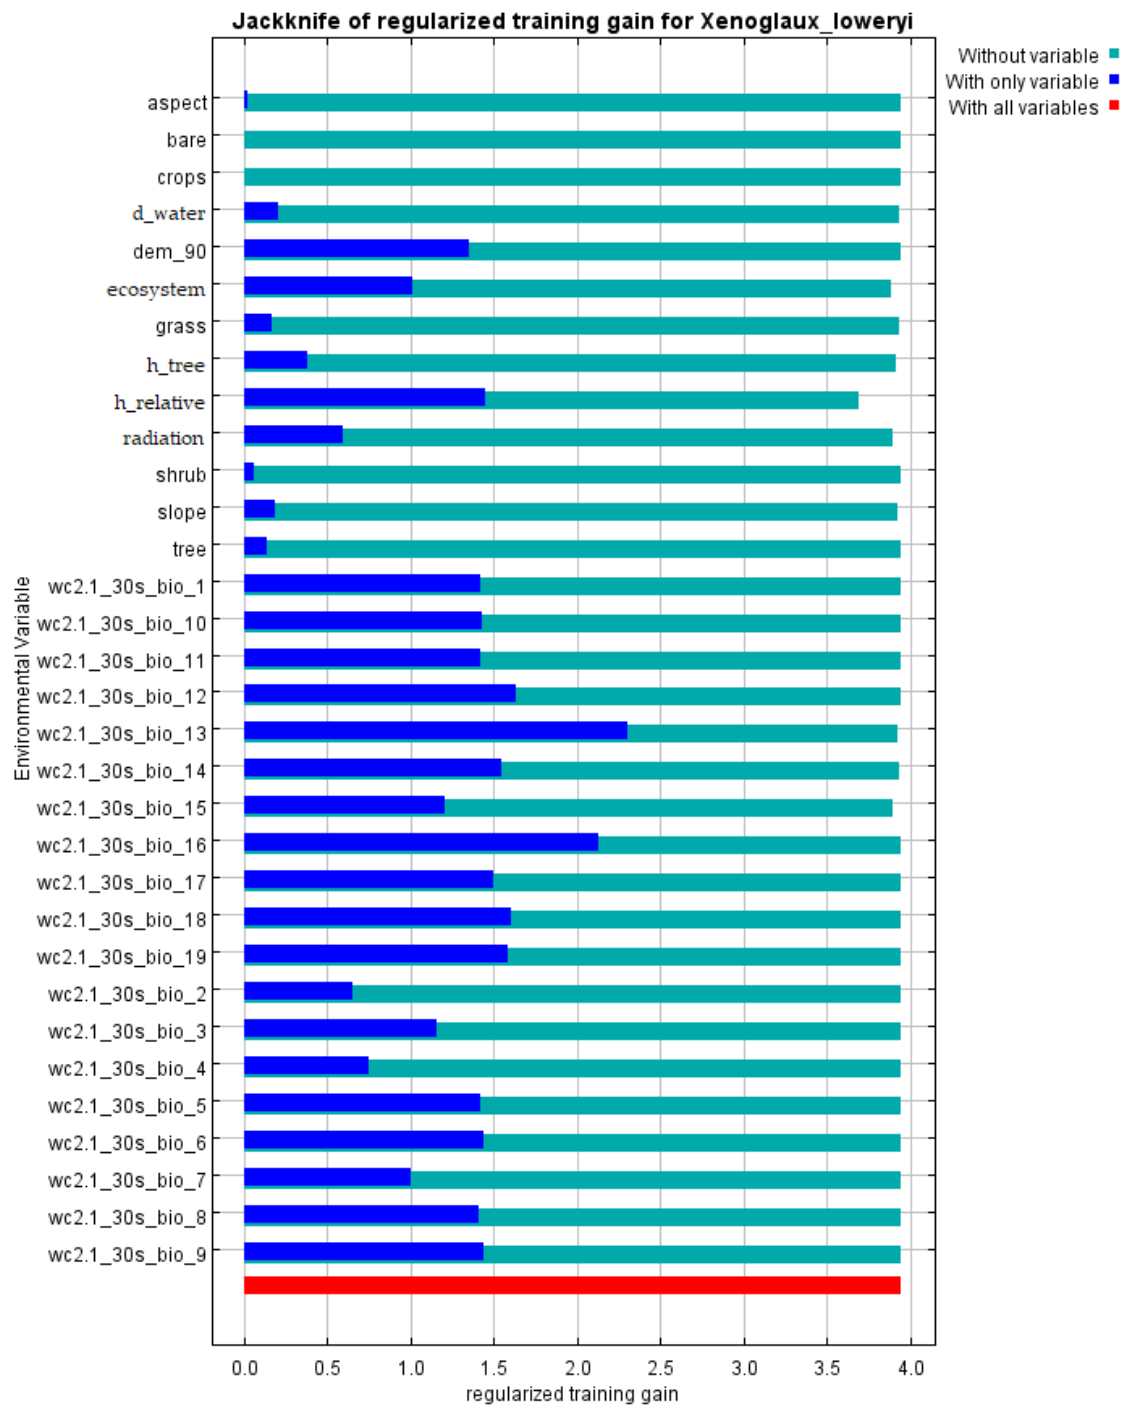

**Table S3.** A description of the ecosystem types comprising Amazonas and San Martin areas (Peru).

| Code | description                             |
|------|-----------------------------------------|
| 1    | Wetlands                                |
| 2    | Yunga high altimontane (pluvial) forest |
| 3    | Flooded alluvial forest                 |
| 4    | Basimontane Yunga Forest                |
| 5    | High hill forest                        |
| 6    | Low hill forest                         |
| 7    | Non-flooded terrace forest              |
| 8    | Inter-Andean seasonally dry forest      |
| 9    | Seasonally dry forest in the east       |
| 10   | Yunga montane forest                    |
| 11   | Montane relict forest on western slope  |
| 12   | Island                                  |
| 13   | Jalca region                            |
| 14   | Lake and lagoon                         |
| 15   | Andean scrubland                        |
| 16   | Puna humid grassland                    |
| 17   | Palm tree swamp                         |
| 18   | Herbaceous shrub swamp                  |
| 19   | Grasslands/Herbaceous                   |
| 20   | Plantation forestry                     |
| 21   | River                                   |
| 22   | Varillales forest                       |
| 23   | Secondary forest                        |
| 24   | Agricultural area                       |
| 25   | Urban area                              |

**Table S4.** Area (in km<sup>2</sup> and %) of the total potential distribution expected under both current conditions and climate change scenarios of *X. loweryi* in the different categories of Natural Protected Areas in Amazonas and San Martin territories (Peru).

| Model           | Habitat suitability | Area (Km <sup>2</sup> ) | Protected natural area categories <sup>1,2</sup> |            |           |             |            |           |             |            |
|-----------------|---------------------|-------------------------|--------------------------------------------------|------------|-----------|-------------|------------|-----------|-------------|------------|
|                 |                     |                         | NP                                               | NS         | CR        | AMPF        | RZ         | RCA       | PCA         | Total      |
|                 |                     |                         | 17162.33                                         | 392.38     | 1186.05   | 1820.00     | 4347.98    | 4026.33   | 1574.63     | 30509.70   |
| current         | High                | 140.85                  | 0.00                                             | 0.00       | 0.00      | 13.29       | 4.17       | 0.00      | 23.29       | 40.76      |
|                 |                     |                         | 0 (0)                                            | 0 (0)      | 0 (0)     | 9.4 (0.7)   | 3 (0.1)    | 0 (0)     | 16.5 (1.5)  | 28.9 (0.1) |
|                 | Moderate            | 416.88                  | 0.00                                             | 0.03       | 0.02      | 117.62      | 38.92      | 0.00      | 28.18       | 184.77     |
|                 |                     |                         | 0 (0)                                            | 0 (0)      | 0 (0)     | 28.2 (6.5)  | 9.3 (0.9)  | 0 (0)     | 6.8 (1.8)   | 44.3 (0.6) |
|                 | Low                 | 1048.79                 | 0.00                                             | 6.36       | 2.77      | 287.94      | 74.10      | 0.14      | 53.92       | 425.23     |
|                 |                     |                         | 0 (0)                                            | 0.6 (1.6)  | 0.3 (0.2) | 27.5 (15.8) | 7.1 (1.7)  | 0 (0)     | 5.1 (3.4)   | 40.5 (1.4) |
|                 | Total               | 1606.52                 | 0.00                                             | 6.39       | 2.79      | 418.86      | 117.19     | 0.14      | 105.39      | 650.76     |
|                 |                     |                         | 0 (0)                                            | 0.4 (1.6)  | 0.2 (0.2) | 26.1 (23)   | 7.3 (2.7)  | 0 (0)     | 6.6 (6.7)   | 40.5 (2.1) |
| 2050<br>RCP 4.5 | High                | 186.32                  | 0.00                                             | 0.00       | 0.00      | 17.98       | 18.92      | 0.00      | 26.55       | 63.44      |
|                 |                     |                         | 0 (0)                                            | 0 (0)      | 0 (0)     | 9.6 (1)     | 10.2 (0.4) | 0 (0)     | 14.2 (1.7)  | 34.1 (0.2) |
|                 | Moderate            | 553.93                  | 0.00                                             | 2.62       | 0.00      | 132.33      | 57.30      | 0.00      | 35.49       | 227.73     |
|                 |                     |                         | 0 (0)                                            | 0.5 (0.7)  | 0 (0)     | 23.9 (7.3)  | 10.3 (1.3) | 0 (0)     | 6.4 (2.3)   | 41.1 (0.7) |
|                 | Low                 | 1216.11                 | 0.00                                             | 50.30      | 4.72      | 297.20      | 98.11      | 0.00      | 97.81       | 548.14     |
|                 |                     |                         | 0 (0)                                            | 4.1 (12.8) | 0.4 (0.4) | 24.4 (16.3) | 8.1 (2.3)  | 0 (0)     | 8 (6.2)     | 45.1 (1.8) |
|                 | Total               | 1956.36                 | 0.00                                             | 52.92      | 4.72      | 447.51      | 174.33     | 0.00      | 159.84      | 839.31     |
|                 |                     |                         | 0 (0)                                            | 2.7 (13.5) | 0.2 (0.4) | 22.9 (24.6) | 8.9 (4)    | 0 (0)     | 8.2 (10.2)  | 42.9 (2.8) |
| 2050<br>RCP 8.5 | High                | 133.95                  | 0.00                                             | 0.00       | 0.00      | 31.66       | 6.18       | 0.00      | 15.47       | 53.31      |
|                 |                     |                         | 0 (0)                                            | 0.0        | 0 (0)     | 23.6 (1.7)  | 4.6 (0.1)  | 0 (0)     | 11.5 (1)    | 39.8 (0.2) |
|                 | Moderate            | 461.82                  | 0.00                                             | 0.00       | 0.00      | 134.03      | 46.59      | 0.00      | 33.97       | 214.59     |
|                 |                     |                         | 0 (0)                                            | 0 (0)      | 0 (0)     | 29 (7.4)    | 10.1 (1.1) | 0 (0)     | 7.4 (2.2)   | 46.5 (0.7) |
|                 | Low                 | 1218.45                 | 0.00                                             | 5.73       | 1.15      | 352.29      | 111.90     | 0.00      | 71.02       | 542.08     |
|                 |                     |                         | 0 (0)                                            | 0.5 (1.5)  | 0.1 (0.1) | 28.9 (19.4) | 9.2 (2.6)  | 0 (0)     | 5.8 (4.5)   | 44.5 (1.8) |
|                 | Total               | 1814.22                 | 0.00                                             | 5.73       | 1.15      | 517.98      | 164.66     | 0.00      | 120.46      | 809.99     |
|                 |                     |                         | 0 (0)                                            | 0.3 (1.5)  | 0.1 (0.1) | 28.6 (28.5) | 9.1 (3.8)  | 0 (0)     | 6.6 (7.7)   | 44.6 (2.7) |
| 2070<br>RCP 4.5 | High                | 126.28                  | 0.00                                             | 0.00       | 0.00      | 41.87       | 0.88       | 0.00      | 17.96       | 60.72      |
|                 |                     |                         | 0 (0)                                            | 0 (0)      | 0 (0)     | 33.2 (2.3)  | 0.7 (0)    | 0 (0)     | 14.2 (1.1)  | 48.1 (0.2) |
|                 | Moderate            | 404.81                  | 0.00                                             | 0.00       | 0.00      | 126.02      | 28.22      | 0.00      | 33.97       | 188.21     |
|                 |                     |                         | 0 (0)                                            | 0 (0)      | 0 (0)     | 31.1 (6.9)  | 7 (0.6)    | 0 (0)     | 8.4 (2.2)   | 46.5 (0.6) |
|                 | Low                 | 990.19                  | 0.00                                             | 1.87       | 0.01      | 255.20      | 88.21      | 0.01      | 55.51       | 400.82     |
|                 |                     |                         | 0 (0)                                            | 0.2 (0.5)  | 0 (0)     | 25.8 (14)   | 8.9 (2)    | 0 (0)     | 5.6 (3.5)   | 40.5 (1.3) |
|                 | Total               | 1521.28                 | 0.00                                             | 1.87       | 0.01      | 423.09      | 117.31     | 0.01      | 107.45      | 649.74     |
|                 |                     |                         | 0 (0)                                            | 0.1 (0.5)  | 0 (0)     | 27.8 (23.2) | 7.7 (2.7)  | 0 (0)     | 7.1 (6.8)   | 42.7 (2.1) |
| 2070<br>RCP 8.5 | High                | 234.19                  | 0.00                                             | 0.00       | 0.00      | 63.71       | 12.95      | 0.00      | 29.17       | 105.84     |
|                 |                     |                         | 0 (0)                                            | 0 (0)      | 0 (0)     | 27.2 (3.5)  | 5.5 (0.3)  | 0 (0)     | 12.5 (1.9)  | 45.2 (0.3) |
|                 | Moderate            | 529.89                  | 0.00                                             | 0.65       | 0.16      | 159.49      | 54.95      | 0.18      | 29.28       | 244.71     |
|                 |                     |                         | 0 (0)                                            | 0.1 (0.2)  | 0 (0)     | 30.1 (8.8)  | 10.4 (1.3) | 0 (0)     | 5.5 (1.9)   | 46.2 (0.8) |
|                 | Low                 | 1184.01                 | 0.00                                             | 34.96      | 2.99      | 343.95      | 112.67     | 3.86      | 66.46       | 564.89     |
|                 |                     |                         | 0 (0)                                            | 3 (8.9)    | 0.3 (0.3) | 29 (18.9)   | 9.5 (2.6)  | 0.3 (0.1) | 5.6 (4.2)   | 47.7 (1.9) |
|                 | Total               | 1948.09                 | 0.00                                             | 35.62      | 3.15      | 567.15      | 180.58     | 4.04      | 124.91      | 915.44     |
|                 |                     |                         | 0 (0)                                            | 5 (20.9)   | 0 (0)     | 34.9 (31.2) | 0 (0)      | 2.1 (0.8) | 16.7 (17.3) | 58.8 (3.1) |
| IUCN            | Extant              | 1627.02                 | 0.00                                             | 82.12      | 0.00      | 568.20      | 0.10       | 33.97     | 271.72      | 956.11     |
|                 |                     |                         | 0 (0)                                            | 5 (20.9)   | 0 (0)     | 34.9 (31.2) | 0 (0)      | 2.1 (0.8) | 16.7 (17.3) | 58.8 (3.1) |

<sup>1</sup> The area in km<sup>2</sup> in normal font and its meaning in percentage (%) in italics. Without parentheses the percentage (%) with respect to the area of the potential habitat range and in parentheses the percentage (%) with respect to the area of the NPA modalities

<sup>2</sup> NP: National Park, NS: National Sanctuary, CR: Communal Reserve, AMPF: Alto Mayo protection forest, RZ: Reserved Zones, RCA: Regional Conservation Areas, PCA: Private Conservation Areas

**Table S5.** Contributions (%) of the environmental variables in the current suitability habitat and in the climate change scenarios.

| Environmental variables | Current(%) | 2050(%) |         | 2070(%) |         |
|-------------------------|------------|---------|---------|---------|---------|
|                         |            | RCP 4.5 | RCP 8.5 | RCP 4.5 | RCP 8.5 |
| Bio13                   | 24.3       | 21.4    | 29.9    | 18.7    | 15.2    |
| Bio15                   | 22.2       | 0.8     | 1       | 0       | 0.5     |
| Bio9                    | 20.7       | 27.5    | 14.2    | 26      | 9.5     |
| Ecosystems              | 14         | 11.5    | 20.2    | 17.7    | 23      |
| Relative humidity       | 9.8        | 3.9     | 7       | 6.1     | 2.6     |
| Slope                   | 3.4        | 0.6     | 0.5     | 3.3     | 2.3     |
| grass cover             | 2          | 1.7     | 2.6     | 0.2     | 1       |
| Bio19                   | 1.1        | 20.5    | 21.1    | 24.7    | 19.1    |
| radiation               | 0.9        | 3.7     | 1.1     | 1       | 1.5     |
| Bio7                    | 0.9        | 5.7     | 0       | 0.1     | 11.1    |
| Aspect                  | 0.2        | 0       | 0.4     | 0.4     | 0.3     |
| D_water                 | 0.2        | 0       | 0.1     | 0.1     | 0.1     |
| tree height             | 0.1        | 0.4     | 0.2     | 0       | 0.4     |
| Tree cover              | 0.1        | 0.3     | 0.4     | 0       | 0.5     |
| Crop cover              | 0          | 0       | 0.4     | 0       | 0       |
| Bio4                    | 0          | 1.1     | 0.3     | 0       | 3.3     |
| Shrub cover             | 0          | 0.8     | 0.6     | 1.9     | 1.7     |
| Alitude                 | 0          | 0.1     | 0.1     | 0       | 7.7     |
| <b>Total</b>            | 100        | 100     | 100     | 100     | 100     |
